# Supplementary material
Source: HighWire-hosted journal article supplement (http://dmd.aspetjournals.org/highwire/filestream/66441/field_highwire_adjunct_files/0/Supplemental_files_56887.pdf)
Supplement: Supplemental_files_56887.pdf [file Supplemental_files_56887.pdf]

Identification and Functional Characterization of Novel Nonsynonymous Variants in the

Human Multidrug and Toxin Extrusion 2-K (MATE2-K)

Kenta Nishimura, Ryosuke Ide, Takeshi Hirota, Kana Kawazu, Sho Kodama, Hiroaki

Takesue, and Ichiro Ieiri

Department of Clinical Pharmacokinetics, Graduate School of Pharmaceutical Sciences,

Kyushu University, Fukuoka, Japan (K.N., R.I., T.H., K.K., S.K., H.T., I.I.)

Journal Title: Drug Metabolism & Disposition

Fig. 1s

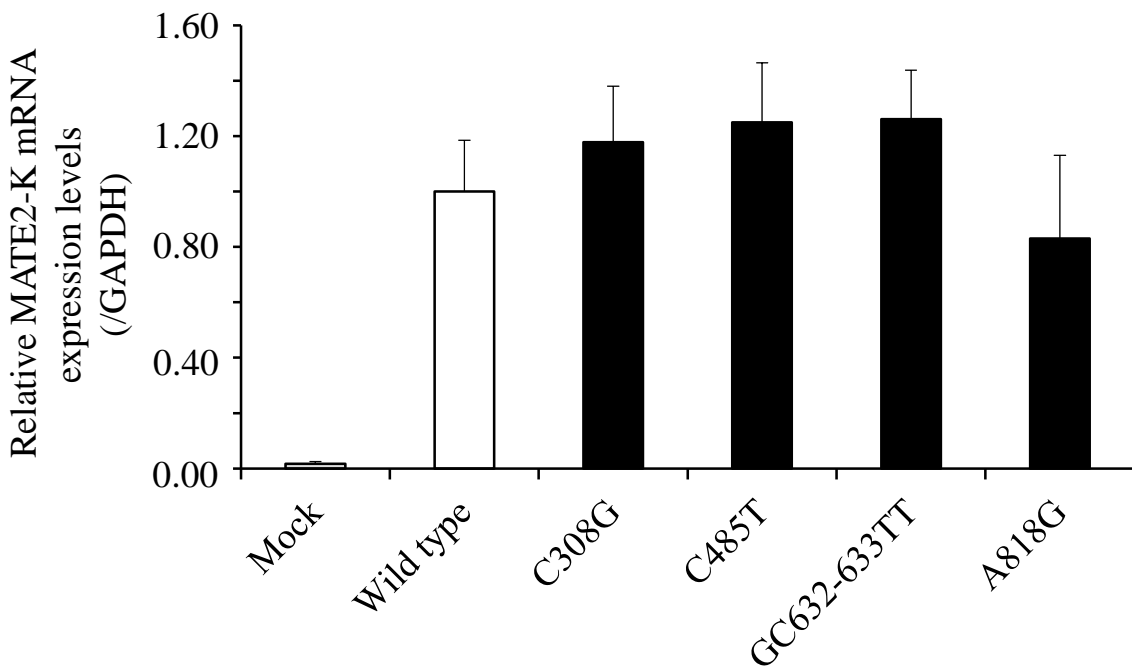

Fig. 1s. Relative MATE2-K mRNA levels of MATE2-K wild type and its variants in transfected HEK293 cells. MATE2-K mRNA expression level was normalized with glyceraldehyde 3-phosphate dehydrogenase (GAPDH). Relative MATE2-K mRNA expression levels were expressed as ratios of the relative MATE2-K mRNA in the wild type.

Fig. 2s

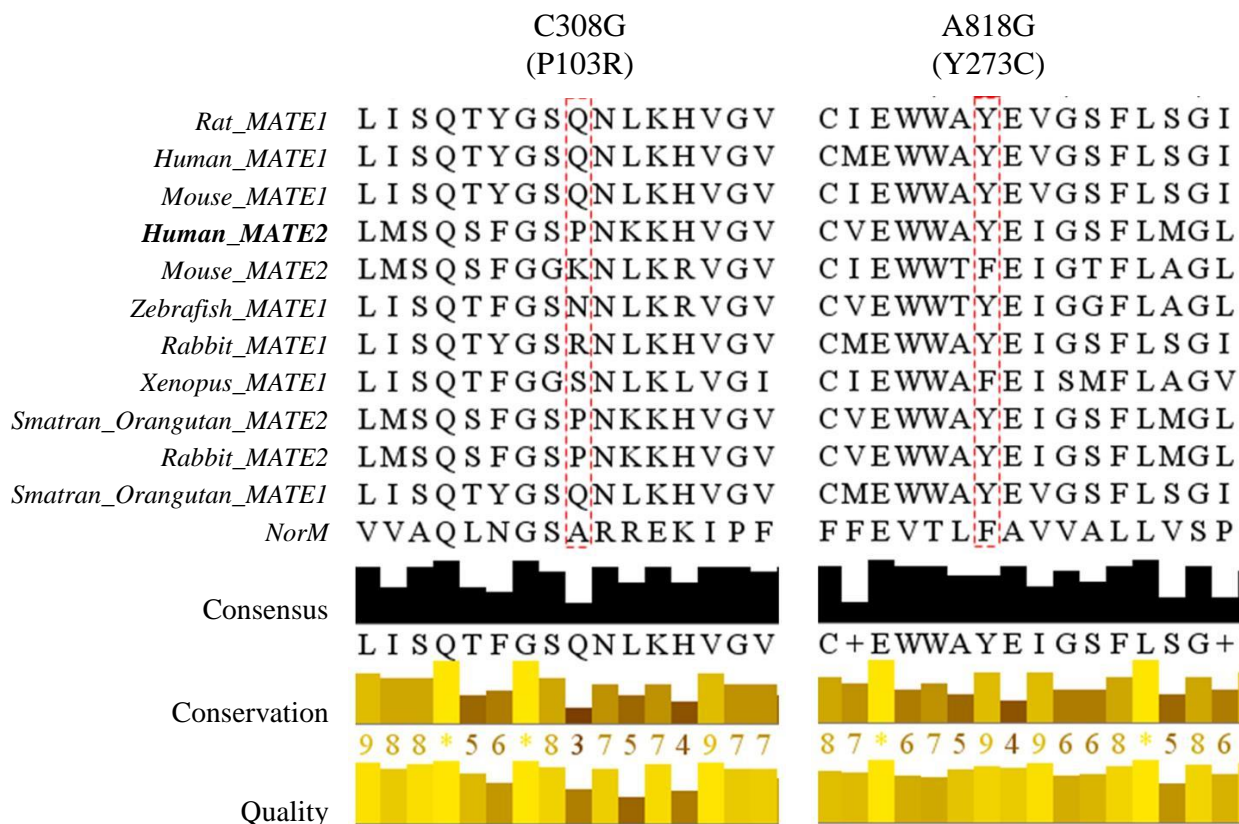

Fig. 2s. Comparison of the amino acid sequences of MATEs between organisms. The alignment file was produced from BLASTP (<http://blast.ncbi.nlm.nih.gov/Blast.cgi?PAGE=Protein>) and visualized by Jalview Version 2 (developed from 2004 at University of Dundee with support from the BBSRC).

TABLE S1-a

Oligonucleotide primers for genotyping of the *SLC47A2* (MATE2-K) gene (5' region)

| Location                              | Primer (5' to 3')                   | Direction | Position <sup>a</sup> (5') | Position <sup>a</sup> (3') | Annealing (°C) | Amplified length (bp) |                                     |   |          |          |      |     |                                     |   |          |          |                                     |   |          |          |      |     |                                     |   |          |          |                                     |   |          |          |      |     |                                     |   |          |          |                                     |   |          |          |      |     |                                     |   |          |          |                                     |   |          |          |      |     |                                     |   |          |          |                                     |   |          |          |      |     |                                     |   |          |          |                                     |   |          |          |      |     |                                     |   |
|---------------------------------------|-------------------------------------|-----------|----------------------------|----------------------------|----------------|-----------------------|-------------------------------------|---|----------|----------|------|-----|-------------------------------------|---|----------|----------|-------------------------------------|---|----------|----------|------|-----|-------------------------------------|---|----------|----------|-------------------------------------|---|----------|----------|------|-----|-------------------------------------|---|----------|----------|-------------------------------------|---|----------|----------|------|-----|-------------------------------------|---|----------|----------|-------------------------------------|---|----------|----------|------|-----|-------------------------------------|---|----------|----------|-------------------------------------|---|----------|----------|------|-----|-------------------------------------|---|----------|----------|-------------------------------------|---|----------|----------|------|-----|-------------------------------------|---|
| Promoter<br>(-2165~108 <sup>b</sup> ) | 5'- GAG TCA GTA ATC GCC CTT GCT -3' | F         | 19622033                   | 19622013                   | 55.7           | 380                   |                                     |   |          |          |      |     |                                     |   |          |          |                                     |   |          |          |      |     |                                     |   |          |          |                                     |   |          |          |      |     |                                     |   |          |          |                                     |   |          |          |      |     |                                     |   |          |          |                                     |   |          |          |      |     |                                     |   |          |          |                                     |   |          |          |      |     |                                     |   |          |          |                                     |   |          |          |      |     |                                     |   |
|                                       | 5'- GGT ATA GGC AGA AGA ATC CAT -3' | R         | 19621674                   | 19621654                   |                |                       | 5'- CTG GTC AGC TCT GGA TAA AGC -3' | F | 19621797 | 19621777 | 64.0 | 394 | 5'- AGT TCT CAT GGT CAG CCT ACC -3' | R | 19621424 | 19621404 | 5'- TGG AAG AGG TAG GCT GAC CAT -3' | F | 19621431 | 19621411 | 55.7 | 428 | 5'- GGA GAG GAG GCA GGA CAA ATA -3' | R | 19621024 | 19621004 | 5'- CCG CCC ATG GGT GTA GCA AAC -3' | F | 19621061 | 19621041 | 62.3 | 436 | 5'- TCG ACG TCC CAC AGG GTC CTC -3' | R | 19620646 | 19620626 | 5'- CAC TGC CCT GCT GGT CTT GAG -3' | F | 19620737 | 19620717 | 63.3 | 250 | 5'- CTA GGA CAC CTC GGC GGA GTC -3' | R | 19620508 | 19620488 | 5'- ATG CTG CTG AAA GGG GTG ACG -3' | F | 19620546 | 19620526 | 63.3 | 361 | 5'- AGT GGC TGT GGG AGG TGT GCT -3' | R | 19620206 | 19620186 | 5'- TTT GGG AAG GTG ACA GAG GAC -3' | F | 19620661 | 19620641 | 59.5 | 591 | 5'- CAG CCA CTA GGG AGG ACA GGT -3' | R | 19620091 | 19620071 | 5'- GAC ACA ACA GGC AGC GGT CTG -3' | F | 19620126 | 19620106 | 64.0 | 367 | 5'- GGG CAA AGA GAG TCC ACA TCT -3' | R |
|                                       | 5'- CTG GTC AGC TCT GGA TAA AGC -3' | F         | 19621797                   | 19621777                   | 64.0           | 394                   |                                     |   |          |          |      |     |                                     |   |          |          |                                     |   |          |          |      |     |                                     |   |          |          |                                     |   |          |          |      |     |                                     |   |          |          |                                     |   |          |          |      |     |                                     |   |          |          |                                     |   |          |          |      |     |                                     |   |          |          |                                     |   |          |          |      |     |                                     |   |          |          |                                     |   |          |          |      |     |                                     |   |
|                                       | 5'- AGT TCT CAT GGT CAG CCT ACC -3' | R         | 19621424                   | 19621404                   |                |                       | 5'- TGG AAG AGG TAG GCT GAC CAT -3' | F | 19621431 | 19621411 | 55.7 | 428 | 5'- GGA GAG GAG GCA GGA CAA ATA -3' | R | 19621024 | 19621004 | 5'- CCG CCC ATG GGT GTA GCA AAC -3' | F | 19621061 | 19621041 | 62.3 | 436 | 5'- TCG ACG TCC CAC AGG GTC CTC -3' | R | 19620646 | 19620626 | 5'- CAC TGC CCT GCT GGT CTT GAG -3' | F | 19620737 | 19620717 | 63.3 | 250 | 5'- CTA GGA CAC CTC GGC GGA GTC -3' | R | 19620508 | 19620488 | 5'- ATG CTG CTG AAA GGG GTG ACG -3' | F | 19620546 | 19620526 | 63.3 | 361 | 5'- AGT GGC TGT GGG AGG TGT GCT -3' | R | 19620206 | 19620186 | 5'- TTT GGG AAG GTG ACA GAG GAC -3' | F | 19620661 | 19620641 | 59.5 | 591 | 5'- CAG CCA CTA GGG AGG ACA GGT -3' | R | 19620091 | 19620071 | 5'- GAC ACA ACA GGC AGC GGT CTG -3' | F | 19620126 | 19620106 | 64.0 | 367 | 5'- GGG CAA AGA GAG TCC ACA TCT -3' | R | 19619780 | 19619760 |                                     |   |          |          |      |     |                                     |   |
|                                       | 5'- TGG AAG AGG TAG GCT GAC CAT -3' | F         | 19621431                   | 19621411                   | 55.7           | 428                   |                                     |   |          |          |      |     |                                     |   |          |          |                                     |   |          |          |      |     |                                     |   |          |          |                                     |   |          |          |      |     |                                     |   |          |          |                                     |   |          |          |      |     |                                     |   |          |          |                                     |   |          |          |      |     |                                     |   |          |          |                                     |   |          |          |      |     |                                     |   |          |          |                                     |   |          |          |      |     |                                     |   |
|                                       | 5'- GGA GAG GAG GCA GGA CAA ATA -3' | R         | 19621024                   | 19621004                   |                |                       | 5'- CCG CCC ATG GGT GTA GCA AAC -3' | F | 19621061 | 19621041 | 62.3 | 436 | 5'- TCG ACG TCC CAC AGG GTC CTC -3' | R | 19620646 | 19620626 | 5'- CAC TGC CCT GCT GGT CTT GAG -3' | F | 19620737 | 19620717 | 63.3 | 250 | 5'- CTA GGA CAC CTC GGC GGA GTC -3' | R | 19620508 | 19620488 | 5'- ATG CTG CTG AAA GGG GTG ACG -3' | F | 19620546 | 19620526 | 63.3 | 361 | 5'- AGT GGC TGT GGG AGG TGT GCT -3' | R | 19620206 | 19620186 | 5'- TTT GGG AAG GTG ACA GAG GAC -3' | F | 19620661 | 19620641 | 59.5 | 591 | 5'- CAG CCA CTA GGG AGG ACA GGT -3' | R | 19620091 | 19620071 | 5'- GAC ACA ACA GGC AGC GGT CTG -3' | F | 19620126 | 19620106 | 64.0 | 367 | 5'- GGG CAA AGA GAG TCC ACA TCT -3' | R | 19619780 | 19619760 |                                     |   |          |          |      |     |                                     |   |          |          |                                     |   |          |          |      |     |                                     |   |
|                                       | 5'- CCG CCC ATG GGT GTA GCA AAC -3' | F         | 19621061                   | 19621041                   | 62.3           | 436                   |                                     |   |          |          |      |     |                                     |   |          |          |                                     |   |          |          |      |     |                                     |   |          |          |                                     |   |          |          |      |     |                                     |   |          |          |                                     |   |          |          |      |     |                                     |   |          |          |                                     |   |          |          |      |     |                                     |   |          |          |                                     |   |          |          |      |     |                                     |   |          |          |                                     |   |          |          |      |     |                                     |   |
|                                       | 5'- TCG ACG TCC CAC AGG GTC CTC -3' | R         | 19620646                   | 19620626                   |                |                       | 5'- CAC TGC CCT GCT GGT CTT GAG -3' | F | 19620737 | 19620717 | 63.3 | 250 | 5'- CTA GGA CAC CTC GGC GGA GTC -3' | R | 19620508 | 19620488 | 5'- ATG CTG CTG AAA GGG GTG ACG -3' | F | 19620546 | 19620526 | 63.3 | 361 | 5'- AGT GGC TGT GGG AGG TGT GCT -3' | R | 19620206 | 19620186 | 5'- TTT GGG AAG GTG ACA GAG GAC -3' | F | 19620661 | 19620641 | 59.5 | 591 | 5'- CAG CCA CTA GGG AGG ACA GGT -3' | R | 19620091 | 19620071 | 5'- GAC ACA ACA GGC AGC GGT CTG -3' | F | 19620126 | 19620106 | 64.0 | 367 | 5'- GGG CAA AGA GAG TCC ACA TCT -3' | R | 19619780 | 19619760 |                                     |   |          |          |      |     |                                     |   |          |          |                                     |   |          |          |      |     |                                     |   |          |          |                                     |   |          |          |      |     |                                     |   |
|                                       | 5'- CAC TGC CCT GCT GGT CTT GAG -3' | F         | 19620737                   | 19620717                   | 63.3           | 250                   |                                     |   |          |          |      |     |                                     |   |          |          |                                     |   |          |          |      |     |                                     |   |          |          |                                     |   |          |          |      |     |                                     |   |          |          |                                     |   |          |          |      |     |                                     |   |          |          |                                     |   |          |          |      |     |                                     |   |          |          |                                     |   |          |          |      |     |                                     |   |          |          |                                     |   |          |          |      |     |                                     |   |
|                                       | 5'- CTA GGA CAC CTC GGC GGA GTC -3' | R         | 19620508                   | 19620488                   |                |                       | 5'- ATG CTG CTG AAA GGG GTG ACG -3' | F | 19620546 | 19620526 | 63.3 | 361 | 5'- AGT GGC TGT GGG AGG TGT GCT -3' | R | 19620206 | 19620186 | 5'- TTT GGG AAG GTG ACA GAG GAC -3' | F | 19620661 | 19620641 | 59.5 | 591 | 5'- CAG CCA CTA GGG AGG ACA GGT -3' | R | 19620091 | 19620071 | 5'- GAC ACA ACA GGC AGC GGT CTG -3' | F | 19620126 | 19620106 | 64.0 | 367 | 5'- GGG CAA AGA GAG TCC ACA TCT -3' | R | 19619780 | 19619760 |                                     |   |          |          |      |     |                                     |   |          |          |                                     |   |          |          |      |     |                                     |   |          |          |                                     |   |          |          |      |     |                                     |   |          |          |                                     |   |          |          |      |     |                                     |   |
|                                       | 5'- ATG CTG CTG AAA GGG GTG ACG -3' | F         | 19620546                   | 19620526                   | 63.3           | 361                   |                                     |   |          |          |      |     |                                     |   |          |          |                                     |   |          |          |      |     |                                     |   |          |          |                                     |   |          |          |      |     |                                     |   |          |          |                                     |   |          |          |      |     |                                     |   |          |          |                                     |   |          |          |      |     |                                     |   |          |          |                                     |   |          |          |      |     |                                     |   |          |          |                                     |   |          |          |      |     |                                     |   |
|                                       | 5'- AGT GGC TGT GGG AGG TGT GCT -3' | R         | 19620206                   | 19620186                   |                |                       | 5'- TTT GGG AAG GTG ACA GAG GAC -3' | F | 19620661 | 19620641 | 59.5 | 591 | 5'- CAG CCA CTA GGG AGG ACA GGT -3' | R | 19620091 | 19620071 | 5'- GAC ACA ACA GGC AGC GGT CTG -3' | F | 19620126 | 19620106 | 64.0 | 367 | 5'- GGG CAA AGA GAG TCC ACA TCT -3' | R | 19619780 | 19619760 |                                     |   |          |          |      |     |                                     |   |          |          |                                     |   |          |          |      |     |                                     |   |          |          |                                     |   |          |          |      |     |                                     |   |          |          |                                     |   |          |          |      |     |                                     |   |          |          |                                     |   |          |          |      |     |                                     |   |
|                                       | 5'- TTT GGG AAG GTG ACA GAG GAC -3' | F         | 19620661                   | 19620641                   | 59.5           | 591                   |                                     |   |          |          |      |     |                                     |   |          |          |                                     |   |          |          |      |     |                                     |   |          |          |                                     |   |          |          |      |     |                                     |   |          |          |                                     |   |          |          |      |     |                                     |   |          |          |                                     |   |          |          |      |     |                                     |   |          |          |                                     |   |          |          |      |     |                                     |   |          |          |                                     |   |          |          |      |     |                                     |   |
|                                       | 5'- CAG CCA CTA GGG AGG ACA GGT -3' | R         | 19620091                   | 19620071                   |                |                       | 5'- GAC ACA ACA GGC AGC GGT CTG -3' | F | 19620126 | 19620106 | 64.0 | 367 | 5'- GGG CAA AGA GAG TCC ACA TCT -3' | R | 19619780 | 19619760 |                                     |   |          |          |      |     |                                     |   |          |          |                                     |   |          |          |      |     |                                     |   |          |          |                                     |   |          |          |      |     |                                     |   |          |          |                                     |   |          |          |      |     |                                     |   |          |          |                                     |   |          |          |      |     |                                     |   |          |          |                                     |   |          |          |      |     |                                     |   |
|                                       | 5'- GAC ACA ACA GGC AGC GGT CTG -3' | F         | 19620126                   | 19620106                   | 64.0           | 367                   |                                     |   |          |          |      |     |                                     |   |          |          |                                     |   |          |          |      |     |                                     |   |          |          |                                     |   |          |          |      |     |                                     |   |          |          |                                     |   |          |          |      |     |                                     |   |          |          |                                     |   |          |          |      |     |                                     |   |          |          |                                     |   |          |          |      |     |                                     |   |          |          |                                     |   |          |          |      |     |                                     |   |
|                                       | 5'- GGG CAA AGA GAG TCC ACA TCT -3' | R         | 19619780                   | 19619760                   |                |                       |                                     |   |          |          |      |     |                                     |   |          |          |                                     |   |          |          |      |     |                                     |   |          |          |                                     |   |          |          |      |     |                                     |   |          |          |                                     |   |          |          |      |     |                                     |   |          |          |                                     |   |          |          |      |     |                                     |   |          |          |                                     |   |          |          |      |     |                                     |   |          |          |                                     |   |          |          |      |     |                                     |   |

<sup>a</sup>Reference sequence: NC\_000017.10 GRCh37.p9 primary assembly<sup>b</sup>Number refers to the position from the MATE2-K start codon (reference sequence: NM\_001099646.1)

TABLE S1-b

Oligonucleotide primers for genotyping of the *SLC47A2* (MATE2-K) gene (exon)

| Location                   | Primer (5' to 3')                   | Direction | Position <sup>a</sup> (5') | Position <sup>a</sup> (3') | Annealing (°C) | Amplified length (bp) |
|----------------------------|-------------------------------------|-----------|----------------------------|----------------------------|----------------|-----------------------|
| Exon 1                     | 5'- GCA GGG CTC ATC CCA CAA GTT -3' | F         | 19620030                   | 19620010                   | 65.0           | 420                   |
|                            | 5'- TCT GGA CCT GGC AGT CAA CAT -3' | R         | 19619631                   | 19619611                   |                |                       |
| Exon 2<br>(207, RFLP)      | 5'- TGA CCT CTC GGG GCA CTG GTG -3' | F         | 19618642                   | 19618622                   | 65.0           | 558                   |
|                            | 5'- TCC GCA GAC ATT GAC AAA CTG -3' | R         | 19618105                   | 19618085                   |                |                       |
| Exon 3                     | 5'- TGG TCA GGG ATG GGA AGA CAC -3' | F         | 19618343                   | 19618323                   | 65.0           | 468                   |
|                            | 5'- GCC TGT GGT CCT TGG AGG TAG -3' | R         | 19617896                   | 19617876                   |                |                       |
| IVS 3<br>(c.295-107, RFLP) | 5'- GGC TTT GTC CTG GCT CCA CTT -3' | F         | 19617564                   | 19617544                   | 65.0           | 512                   |
|                            | 5'- TGC CCG GGA CAT TCC TAA ATC -3' | R         | 19617343                   | 19617323                   |                |                       |
| Exon 4<br>(345, RFLP)      | 5'- GGC TTT GTC CTG GCT CCA CTT -3' | F         | 19617564                   | 19617544                   | 58.9           | 242                   |
|                            | 5'- TGT GAG GGC TGG GCA TCT TCA -3' | R         | 19617073                   | 19617053                   |                |                       |
| Exon 5                     | 5'- TTC ACA GTC CTG GCT GAG ACC -3' | F         | 19616183                   | 19616163                   | 65.0           | 238                   |
|                            | 5'- TAG AGT GGG AAA GCA AAA AGC -3' | R         | 19615966                   | 19615946                   |                |                       |
| Exon 6                     | 5'- CCT GGA AAG GAA TGT CTG TTA -3' | F         | 19612155                   | 19612135                   | 55.7           | 415                   |
|                            | 5'- AGG TGT GAG TGA GAT GGA TGG -3' | R         | 19611761                   | 19611741                   |                |                       |
| Exon 7                     | 5'- TGA AAG GGG TCA CTT CCA ACC -3' | F         | 19611918                   | 19611898                   | 65.0           | 419                   |
|                            | 5'- TCC ACT TCA GGA CGG CAC AGG -3' | R         | 19611520                   | 19611500                   |                |                       |
| Exon 8                     | 5'- TGG GCC CTG GTT GAG TCT GAT -3' | F         | 19611306                   | 19611286                   | 65.0           | 340                   |
|                            | 5'- TGC ACC CTC TGC CTG CTG ACC -3' | R         | 19610987                   | 19610967                   |                |                       |
| Exon 9                     | 5'- GCA TCC TCC TCC TCC GTA GGC -3' | F         | 19610269                   | 19610249                   | 65.0           | 446                   |
|                            | 5'- AAG CTG GAA GGG GGC TGG TGA -3' | R         | 19609844                   | 19609824                   |                |                       |

<sup>a</sup>Reference sequence: NC\_000017.10 GRCh37.p9 primary assembly

TABLE S1-b (continued)

| Location              | Primer (5' to 3')                   | Direction | Position <sup>a</sup> (5') | Position <sup>a</sup> (3') | Annealing (°C) | Amplified length (bp) |
|-----------------------|-------------------------------------|-----------|----------------------------|----------------------------|----------------|-----------------------|
| Exon 9<br>(818, RFLP) | 5'- AGG AAT GAG GTG GGC AAG CAG -3' | F         | 19610130                   | 19610110                   | 63.3           | 168                   |
|                       | 5'- ATG AGG AAG CTC CCG ATC TCA -3' | R         | 19609983                   | 19609963                   |                |                       |
| Exon 10               | 5'- TGA GTC CCC AAA GCA AAG CAG -3' | F         | 19608905                   | 19608885                   | 65.0           | 224                   |
|                       | 5'- CCC CTC CTA TGA CAC CTC CAG -3' | R         | 19608702                   | 19608682                   |                |                       |
| Exon 11               | 5'- GCC CAG GCT GGC TCA GGA CTT -3' | F         | 19607564                   | 19607544                   | 55.7           | 313                   |
|                       | 5'- CCA GCA GGC TTG GAA GAT AAA -3' | R         | 19607272                   | 19607252                   |                |                       |
| Exon 12               | 5'- ACT GTC TAG CCC AAA TGA ACG -3' | F         | 19606659                   | 19606639                   | 55.7           | 341                   |
|                       | 5'- TGA GCC AGG AAT GTG ATA AAT -3' | R         | 19606339                   | 19606319                   |                |                       |
| Exon 13               | 5'- GGT GGG GTG TGG AAT AGA AGG -3' | F         | 19606068                   | 19606048                   | 55.7           | 347                   |
|                       | 5'- TGC AGA AGA AGA GGG AAG TCA -3' | R         | 19605742                   | 19605722                   |                |                       |
| Exon 14, 15           | 5'- AGG GAA GAA AGG GAG ATA AGG -3' | F         | 19585134                   | 19585114                   | 62.3           | 537                   |
|                       | 5'- GGC ATT TCT GGC TGA GTA GTC -3' | R         | 19584618                   | 19584598                   |                |                       |
| Exon 16               | 5'- GCC CCA TGA CTA TGA ATA CAT -3' | F         | 19583487                   | 19583467                   | 55.7           | 387                   |
|                       | 5'- TGT TGT CTT CCT GGT GCT TAG -3' | R         | 19583121                   | 19583101                   |                |                       |
| Exon 17-1             | 5'- CTA GGT TTC CCG ATT CCA AGG -3' | F         | 19582297                   | 19582277                   | 55.7           | 466                   |
|                       | 5'- GAC CCC TCT GAG TGT CAC CAC -3' | R         | 19581852                   | 19581832                   |                |                       |
| Exon 17-2             | 5'- ACA CTG ATG GTG GGG CTC ACG -3' | F         | 19582046                   | 19582026                   | 65.0           | 505                   |
|                       | 5'- GAG CAC ACG GGT TGT CTG GAC -3' | R         | 19581562                   | 19581542                   |                |                       |

TABLE S1-c

Oligonucleotide primers for cloning of the *SLC47A2 isoform 2* (MATE2-K) gene

| Task                                       | Primer (5' to 3')                                                                                                    | Direction                          | Length (mer) |
|--------------------------------------------|----------------------------------------------------------------------------------------------------------------------|------------------------------------|--------------|
| Cloning                                    | 5'- AGG <b>GTA</b> CCC AGT GCC CCG GCC AGG AAT GGA -3'                                                               | Sense (KpnI site) <sup>a</sup>     | 30           |
|                                            | 5'- CTG <b>TCT AGA</b> CCC CTC TGA GTG TCA CCA CAA -3'                                                               | Antisense (XbaI site) <sup>a</sup> | 30           |
| Site-directed<br>mutagenesis               | 345A>C<br>5'- CTG CAG CGG GGC GCG CTG GTC CT -3'                                                                     | Sense <sup>b</sup>                 | 23           |
|                                            | 5'- AGG ACC AGC GCG CCC CGC TGC AG -3'                                                                               | Antisense <sup>b</sup>             | 23           |
| mutagenesis                                | 885T>C<br>5'- TGC CCA GGC TGT CAT CTA <b>CGA</b> GGT GGC CA -3'                                                      | Sense <sup>b</sup>                 | 29           |
|                                            | 5'- TGG CCA CCT <b>CGT</b> AGA TGA CAG CCT GGG CA -3'                                                                | Antisense <sup>b</sup>             | 29           |
| MATE2 to MATE2-K<br>(Deletion mutagenesis) | 5'- GGT GAT TTT TCT TTA CAA TCT GCT GGC AAA ATA TTT GCA AAA TCA GAA<br>GAT CAC CTG GCC CCA AGT CCT CAG TGG TGT G -3' | Sense                              | 79           |
|                                            | 5'- CAC ACC ACT GAG GAC TTG GGG CCA GGT GAT CTT CTG ATT TTG CAA ATA<br>TTT TGC CAG CAG ATT GTA AAG AAA AAT CAC C -3' | Antisense                          | 79           |
| FLAG tag <sup>c</sup>                      | 5'- <i><b>CGA TGA CTA CAA AGA CGA TGA CGA CAA G</b></i> -3'                                                          | Sense (ClaI site) <sup>a</sup>     | 28           |
|                                            | 5'- <i><b>GGC CCT TGT CGT CAT CGT CTT TGT AGT CAT</b></i> -3'                                                        | Antisense (NotI site) <sup>a</sup> | 30           |
| FLAG tag fusion                            | 5'- CCA <b>TCG ATC</b> ATT CCT GGC CGG -3'                                                                           | Antisense (ClaI site) <sup>a</sup> | 21           |
| (Inverse PCR)                              | 5'- ATA AGA ATG <b>CGG CCG CGA</b> CAG CCT CCA GG-3'                                                                 | Sense (NotI site) <sup>a</sup>     | 29           |

<sup>a</sup>The restriction endonuclease site is marked in bold letters.<sup>b</sup>The SNP is marked in a bold letter.<sup>c</sup>The FLAG sequences are marked in italic letters.

TABLE S1-d

Oligonucleotide primers for site-directed mutagenesis of the *SLC47A2* (MATE2-K) gene

| SNPs<br>(Amino Acid substitution) | Primer (5' to 3')<br>The SNP is marked in a bold letter.                                                                                                       | Direction          | Length (mer) |
|-----------------------------------|----------------------------------------------------------------------------------------------------------------------------------------------------------------|--------------------|--------------|
| 207G>A<br>(Syn, S69S)             | 5'- GGA GCT GGC ATC <b>AGT</b> GAC CCT CGC G -3'<br>5'- CGC GAG GGT CAC <b>TGA</b> TGC CAG CTC C -3'                                                           | Sense<br>Antisense | 25<br>25     |
| 308C>G<br>(P103R)                 | 5'- GAG CTT CGG CAG <b>CCG</b> CAA CAA GAA GCA CG -3'<br>5'- CGT GCT TCT TGT TGC <b>GGC</b> TGC CGA AGC TC -3'                                                 | Sense<br>Antisense | 29<br>29     |
| 345C>A<br>(Syn, G115G)            | 5'- CTG CAG CGG GGA <b>GCG</b> CTG GTC CT -3'<br>5'- AGG ACC AGC GCT <b>CCC</b> CGC TGC AG -3'                                                                 | Sense<br>Antisense | 23<br>23     |
| 485C>T<br>(P162L)                 | 5'- AAT GAT TTT CAT TCC AGG ACT <b>TCT</b> GGT GAT TTT TCT TTA CAA TCT GC -3'<br>5'- GCA GAT TGT AAA GAA AAA TCA <b>CCA</b> GAA GTC CTG GAA TGA AAA TCA TT -3' | Sense<br>Antisense | 47<br>47     |
| 632_633GC>TT<br>(G211V)           | 5'- CCT GGG GGT CAG <b>GGT</b> TTC CGC CTA TGC CAA -3'<br>5'- TTG GCA TAG GCG GAA <b>ACC</b> CTG ACC CCC AGG -3'                                               | Sense<br>Antisense | 30<br>30     |
| 673G>A<br>(V225I)                 | 5'- CCC AGT TTG CAC AGA CCA TCT TCC TCC TTC TCT AC -3'<br>5'- GTA GAG AAG GAG GAA GAT <b>GGT</b> CTG TGC AAA CTG GG -3'                                        | Sense<br>Antisense | 35<br>35     |
| 818A>G<br>(Y273C)                 | 5'- TTG AGT GGT GGG CCT <b>GTG</b> AGA TCG GGA GC -3'<br>5'- GCT CCC GAT CTC <b>ACA</b> GGC CCA CCA CTC AA -3'                                                 | Sense<br>Antisense | 29<br>29     |
| 885C>T<br>(Syn, Y295Y)            | 5'- TGC CCA GGC TGT CAT CTA <b>TGA</b> GG -3'<br>5'- CCT CAT AGA TGA CAG CCT GGG CA -3'                                                                        | Sense<br>Antisense | 23<br>23     |
| 969G>A<br>(Syn, A323A)            | 5'- CTC TGG GGG CTG <b>CAG</b> ATA CTG TGC AGG -3'<br>5'- CCT GCA CAG TAT <b>CTG</b> CAG CCC CCA GAG -3'                                                       | Sense<br>Antisense | 27<br>27     |
| 1320C>G<br>(Syn, A440A)           | 5'- TGG GCA TGC TGG <b>CGT</b> GTG TCT TCC TGG -3'<br>5'- CCA GGA AGA CAC <b>ACG</b> CCA GCA TGC CCA -3'                                                       | Sense<br>Antisense | 27<br>27     |



TABLE S1-e

Oligonucleotide primers for the sequence of the *SLC47A2* (MATE2-K) gene coding region

| Name  | Location <sup>a</sup> | Primer (5' to 3')                               | Direction | Length (mer) |
|-------|-----------------------|-------------------------------------------------|-----------|--------------|
| T7    | Plasmid <sup>b</sup>  | 5'- TAA TAC GAC TCA CTA TAG GG -3'              | Sense     | 20           |
| 478F  | 478 ~ 495             | 5'- CAG CCC CAA CAA GAA GCA -3'                 | Sense     | 18           |
| 846F  | 846 ~ 863             | 5'- CCG TCT TCC TCC TTC TCT -3'                 | Sense     | 18           |
| 1074F | 1074 ~ 1094           | 5'- TGA CCT ACA TGA TTC CCT TGG -3'             | Sense     | 21           |
| 1512F | 1512 ~ 1529           | 5'- CTG CTG CCT TTG TTG CTT -3'                 | Sense     | 18           |
| 363R  | 380 ~ 363             | 5'- ATG CCA GCT CCA CCT TGC -3'                 | Antisense | 18           |
| 1719R | 1739 ~ 1719           | 5'- CCT CTG GAG TCC TGA AGA AGT -3'             | Antisense | 21           |
| 2002R | 2031 ~ 2002           | 5'- TGT CAC CAC AAG GAA TCA GCC AAA GTT CTT -3' | Antisense | 30           |
| BGH   | Plasmid <sup>b</sup>  | 5'- TAG AAG GCA CAG TCG AGG -3'                 | Antisense | 18           |

<sup>a</sup>Number refers to the position from the MATE2-K transcriptional start site (reference sequence: NM\_001099646.1)

<sup>b</sup>pcDNA3.1(+)

TABLE S2

Polymorphism in the *SLC47A2* gene in 3 ethnic populations ( $n=96$ , each)

| Feature          | Genomic position <sup>a</sup> | CDS position <sup>b</sup> | Nucleotide substitution | dbSNPs ID   | PMT ID <sup>c</sup> | Population | Genotype |     |     | Frequency (%) | <i>P</i> |
|------------------|-------------------------------|---------------------------|-------------------------|-------------|---------------------|------------|----------|-----|-----|---------------|----------|
|                  |                               |                           |                         |             |                     |            | R/R      | R/V | V/V |               |          |
| Promoter         | 19621929                      | -2061                     | G>A                     | rs74786588  | N.A.                | Japanese   | 73       | 23  | 0   | 12.0%         | -        |
|                  |                               |                           |                         |             |                     | Caucasian  | 94       | 2   | 0   | 1.0%          |          |
|                  |                               |                           |                         |             |                     | African    | 93       | 3   | 0   | 1.6%          |          |
|                  | 19621055                      | -1187                     | A>G                     | rs146859478 | N.A.                | Japanese   | 96       | 0   | 0   | 0.0%          | -        |
|                  |                               |                           |                         |             |                     | Caucasian  | 94       | 2   | 0   | 1.0%          |          |
|                  |                               |                           |                         |             |                     | African    | 93       | 3   | 0   | 1.6%          |          |
|                  | 19620624                      | -756                      | T>A                     | rs758426    | N.A.                | Japanese   | 43       | 43  | 10  | 32.8%         | 0.986    |
|                  |                               |                           |                         |             |                     | Caucasian  | 47       | 40  | 9   | 30.2%         |          |
|                  |                               |                           |                         |             |                     | African    | 45       | 41  | 10  | 31.8%         |          |
|                  | 19620477                      | -609                      | T>C                     | rs758427    | N.A.                | Japanese   | 15       | 51  | 30  | 57.8%         | < 0.001  |
|                  |                               |                           |                         |             |                     | Caucasian  | 14       | 45  | 37  | 62.0%         |          |
|                  |                               |                           |                         |             |                     | African    | 4        | 16  | 76  | 87.5%         |          |
| Exon 1<br>5'-UTR | 19619998                      | -130                      | C>T                     | rs12943590  | 5597                | Japanese   | 41       | 42  | 13  | 35.4%         | 0.294    |
|                  |                               |                           |                         |             |                     | Caucasian  | 46       | 43  | 7   | 29.7%         |          |
|                  |                               |                           |                         |             |                     | African    | 53       | 36  | 7   | 26.0%         |          |

<sup>a</sup>Reference sequences: NC\_000017.10 GRCh37.p9 primary assembly (genome) , NM\_001099646.1 (mRNA)<sup>b</sup>5' region: number refers to the position from the start codon<sup>c</sup>N.A. : Not Available

SNPs of rs12943590 are also described as g.-130G&gt;A

TABLE S2 (continued)

| Feature | Genomic position <sup>a</sup> | CDS position <sup>d</sup> | Nucleotide substitution | Amino acid substitution     | dbSNPs ID <sup>c</sup> | PMT ID <sup>c</sup> | Population | Genotype |     |     | Frequency (%) | <i>P</i> |
|---------|-------------------------------|---------------------------|-------------------------|-----------------------------|------------------------|---------------------|------------|----------|-----|-----|---------------|----------|
|         |                               |                           |                         |                             |                        |                     |            | R/R      | R/V | V/V |               |          |
| Exon 2  | 19618447                      | 207                       | G>A                     | Syn <sup>e</sup><br>(S69S)  | rs149511988            | 5599                | Japanese   | 89       | 7   | 0   | 3.6%          | -        |
|         |                               |                           |                         |                             |                        |                     | Caucasian  | 96       | 0   | 0   | 0.0%          |          |
|         |                               |                           |                         |                             |                        |                     | African    | 96       | 0   | 0   | 0.0%          |          |
| IVS 3   | 19617393                      | c.295-107                 | C>A                     | -                           | rs9900497              | 5684                | Japanese   | 36       | 47  | 13  | 38.0%         | 0.945    |
|         |                               |                           |                         |                             |                        |                     | Caucasian  | 36       | 48  | 12  | 37.5%         |          |
|         |                               |                           |                         |                             |                        |                     | African    | 35       | 45  | 16  | 40.1%         |          |
| Exon 4  | 19617273                      | 308                       | C>G                     | P103R                       | N.A.                   | N.A.                | Japanese   | 95       | 1   | 0   | 0.5%          | -        |
|         |                               |                           |                         |                             |                        |                     | Caucasian  | 96       | 0   | 0   | 0.0%          |          |
|         |                               |                           |                         |                             |                        |                     | African    | 96       | 0   | 0   | 0.0%          |          |
| Exon 4  | 19617236                      | 345                       | C>A                     | Syn <sup>e</sup><br>(G115G) | rs4924792              | 5688                | Japanese   | 40       | 43  | 13  | 35.9%         | 0.873    |
|         |                               |                           |                         |                             |                        |                     | Caucasian  | 39       | 45  | 12  | 35.9%         |          |
|         |                               |                           |                         |                             |                        |                     | African    | 37       | 42  | 17  | 39.6%         |          |
| IVS 4   | 19616153                      | c.444-95                  | C>T                     | -                           | rs118148051            | 5636                | Japanese   | 88       | 8   | 0   | 4.2%          | -        |
|         |                               |                           |                         |                             |                        |                     | Caucasian  | 96       | 0   | 0   | 0.0%          |          |
|         |                               |                           |                         |                             |                        |                     | African    | 95       | 1   | 0   | 0.5%          |          |
| IVS 4   | 19616102                      | c.444-44                  | G>C                     | -                           | rs138948843            | 5635                | Japanese   | 88       | 8   | 0   | 4.2%          | -        |
|         |                               |                           |                         |                             |                        |                     | Caucasian  | 96       | 0   | 0   | 0.0%          |          |
|         |                               |                           |                         |                             |                        |                     | African    | 95       | 1   | 0   | 0.5%          |          |

<sup>d</sup>Coding region, number refers to the position from the start codon; Non-coding region, number refers to the position from the nearest CDS

<sup>e</sup>Syn, synonymous

TABLE S2 (continued)

| Feature | Genomic position <sup>a</sup> | CDS position <sup>d</sup> | Nucleotide substitution | Amino acid substitution | dbSNPs ID <sup>c</sup> | PMT ID <sup>c</sup> | Population | Genotype |     |     | Frequency (%) | <i>P</i> |
|---------|-------------------------------|---------------------------|-------------------------|-------------------------|------------------------|---------------------|------------|----------|-----|-----|---------------|----------|
|         |                               |                           |                         |                         |                        |                     |            | R/R      | R/V | V/V |               |          |
| Exon 5  | 19616017                      | 485                       | C>T                     | P162L                   | rs146901447            | 5634                | Japanese   | 96       | 0   | 0   | 0.0%          | -        |
|         |                               |                           |                         |                         |                        |                     | Caucasian  | 96       | 0   | 0   | 0.0%          |          |
|         |                               |                           |                         |                         |                        |                     | African    | 95       | 1   | 0   | 0.5%          |          |
| IVS 5   | 19612080                      | c.487-8                   | C>T                     | -                       | N.A.                   | N.A.                | Japanese   | 96       | 0   | 0   | 0.0%          | -        |
|         |                               |                           |                         |                         |                        |                     | Caucasian  | 96       | 0   | 0   | 0.0%          |          |
|         |                               |                           |                         |                         |                        |                     | African    | 95       | 1   | 0   | 0.5%          |          |
|         | 19611984                      | c.531+45                  | G>A                     | -                       | rs117788366            | N.A.                | Japanese   | 86       | 10  | 0   | 5.2%          | -        |
|         |                               |                           |                         |                         |                        |                     | Caucasian  | 96       | 0   | 0   | 0.0%          |          |
|         |                               |                           |                         |                         |                        |                     | African    | 96       | 0   | 0   | 0.0%          |          |
| IVS 6   | 19611823                      | c.532-111                 | C>T                     | -                       | rs144454382            | 5691                | Japanese   | 96       | 0   | 0   | 0.0%          | -        |
|         |                               |                           |                         |                         |                        |                     | Caucasian  | 95       | 1   | 0   | 0.5%          |          |
|         |                               |                           |                         |                         |                        |                     | African    | 88       | 8   | 0   | 4.2%          |          |
|         | 19611776                      | c.532-64                  | G>A                     | -                       | rs138969135            | N.A.                | Japanese   | 96       | 0   | 0   | 0.0%          | -        |
|         |                               |                           |                         |                         |                        |                     | Caucasian  | 94       | 2   | 0   | 1.0%          |          |
|         |                               |                           |                         |                         |                        |                     | African    | 96       | 0   | 0   | 0.0%          |          |
| IVS 7   | 19611226                      | c.630-70                  | C>T                     | -                       | rs74371840             | 5642                | Japanese   | 95       | 1   | 0   | 0.5%          | -        |
|         |                               |                           |                         |                         |                        |                     | Caucasian  | 96       | 0   | 0   | 0.0%          |          |
|         |                               |                           |                         |                         |                        |                     | African    | 96       | 0   | 0   | 0.0%          |          |

TABLE S2 (continued)

| Feature | Genomic position <sup>a</sup> | CDS position <sup>d</sup> | Nucleotide substitution | Amino acid substitution     | dbSNPs ID <sup>c</sup>       | PMT ID <sup>c</sup> | Population | Genotype  |     |     | Frequency (%) | <i>P</i> |   |
|---------|-------------------------------|---------------------------|-------------------------|-----------------------------|------------------------------|---------------------|------------|-----------|-----|-----|---------------|----------|---|
|         |                               |                           |                         |                             |                              |                     |            | R/R       | R/V | V/V |               |          |   |
| Exon 8  | 19611154                      | 632                       | G>T                     | G211V                       | rs111060532<br>(ss104806862) | N.A.                | Japanese   | 92        | 4   | 0   | 2.1%          | -        |   |
|         |                               |                           |                         |                             |                              |                     | Caucasian  | 96        | 0   | 0   | 0.0%          |          |   |
|         |                               |                           |                         |                             |                              |                     | African    | 96        | 0   | 0   | 0.0%          |          |   |
|         |                               |                           |                         |                             |                              |                     | Japanese   | 92        | 4   | 0   | 2.1%          |          |   |
|         |                               |                           |                         |                             |                              |                     | Caucasian  | 96        | 0   | 0   | 0.0%          |          |   |
|         |                               |                           |                         |                             |                              |                     | African    | 96        | 0   | 0   | 0.0%          |          |   |
|         | 19611153                      | 633                       | C>T                     | -                           | -                            | -                   | -          | Japanese  | 95  | 1   | 0             | 0.5%     | - |
|         |                               |                           |                         |                             |                              |                     |            | Caucasian | 96  | 0   | 0             | 0.0%     |   |
|         |                               |                           |                         |                             |                              |                     |            | African   | 96  | 0   | 0             | 0.0%     |   |
|         |                               |                           |                         |                             |                              |                     |            | Japanese  | 96  | 0   | 0             | 0.0%     |   |
|         |                               |                           |                         |                             |                              |                     |            | Caucasian | 96  | 0   | 0             | 0.0%     |   |
|         |                               |                           |                         |                             |                              |                     |            | African   | 96  | 0   | 0             | 0.0%     |   |
| IVS 8   | 19610990                      | c.727+69                  | G>C                     | -                           | rs145977756                  | 5639                | Japanese   | 94        | 1   | 1   | 1.6%          | -        |   |
|         |                               |                           |                         |                             |                              |                     | Caucasian  | 96        | 0   | 0   | 0.0%          |          |   |
|         |                               |                           |                         |                             |                              |                     | African    | 93        | 3   | 0   | 1.6%          |          |   |
|         |                               |                           |                         |                             |                              |                     | Japanese   | 94        | 1   | 1   | 1.6%          |          |   |
| Exon 9  | 19609984                      | 818                       | A>G                     | Y273C                       | N.A.                         | N.A.                | Caucasian  | 96        | 0   | 0   | 0.0%          | 0.554    |   |
|         |                               |                           |                         |                             |                              |                     | African    | 95        | 1   | 0   | 0.5%          |          |   |
| Exon 10 | 19608773                      | 885                       | C>T                     | Syn <sup>e</sup><br>(Y295Y) | rs4925042                    | 5647                | Japanese   | 47        | 34  | 15  | 33.3%         | 0.055    |   |
|         |                               |                           |                         |                             |                              |                     | Caucasian  | 45        | 42  | 9   | 31.3%         |          |   |
|         |                               |                           |                         |                             |                              |                     | African    | 39        | 33  | 24  | 42.2%         |          |   |

TABLE S2 (continued)

| Feature | Genomic position <sup>a</sup> | CDS position <sup>d</sup> | Nucleotide substitution | Amino acid substitution     | dbSNPs ID <sup>c</sup> | PMT ID <sup>c</sup> | Population | Genotype |     |     | Frequency (%) | <i>P</i> |
|---------|-------------------------------|---------------------------|-------------------------|-----------------------------|------------------------|---------------------|------------|----------|-----|-----|---------------|----------|
|         |                               |                           |                         |                             |                        |                     |            | R/R      | R/V | V/V |               |          |
| IVS 10  | 19608713                      | c.909+36                  | C>T                     | -                           | rs140619422            | 5646                | Japanese   | 96       | 0   | 0   | 0.0%          | < 0.001  |
|         |                               |                           |                         |                             |                        |                     | Caucasian  | 94       | 2   | 0   | 1.0%          |          |
|         |                               |                           |                         |                             |                        |                     | African    | 84       | 11  | 1   | 6.8%          |          |
| Exon 11 | 19607432                      | 969                       | G>A                     | Syn <sup>e</sup><br>(A323A) | rs34169093             | 5601                | Japanese   | 96       | 0   | 0   | 0.0%          | -        |
|         |                               |                           |                         |                             |                        |                     | Caucasian  | 85       | 11  | 0   | 5.7%          |          |
|         |                               |                           |                         |                             |                        |                     | African    | 65       | 31  | 0   | 16.1%         |          |
| IVS 11  | 19607369                      | c.1018+14                 | T>C                     | -                           | N.A.                   | N.A.                | Japanese   | 96       | 0   | 0   | 0.0%          | -        |
|         |                               |                           |                         |                             |                        |                     | Caucasian  | 96       | 0   | 0   | 0.0%          |          |
|         |                               |                           |                         |                             |                        |                     | African    | 95       | 1   | 0   | 0.5%          |          |
| IVS 13  | 19605884                      | c.1164+34                 | T>C                     | -                           | rs116896332            | N.A.                | Japanese   | 88       | 8   | 0   | 4.2%          | -        |
|         |                               |                           |                         |                             |                        |                     | Caucasian  | 96       | 0   | 0   | 0.0%          |          |
|         |                               |                           |                         |                             |                        |                     | African    | 96       | 0   | 0   | 0.0%          |          |
| Exon 15 | 19584752                      | 1320                      | C>G                     | Syn <sup>e</sup><br>(A440A) | rs34416664             | 5614                | Japanese   | 96       | 0   | 0   | 0.0%          | -        |
|         |                               |                           |                         |                             |                        |                     | Caucasian  | 93       | 3   | 0   | 1.6%          |          |
|         |                               |                           |                         |                             |                        |                     | African    | 96       | 0   | 0   | 0.0%          |          |
| IVS 16  | 19583177                      | c.1480+88                 | T>C                     | -                           | rs60425436             | 5651                | Japanese   | 96       | 0   | 0   | 0.0%          | -        |
|         |                               |                           |                         |                             |                        |                     | Caucasian  | 95       | 1   | 0   | 0.5%          |          |
|         |                               |                           |                         |                             |                        |                     | African    | 87       | 9   | 0   | 4.7%          |          |

TABLE S2 (continued)

| Feature           | Genomic position <sup>a</sup> | CDS position <sup>d</sup> | Nucleotide substitution | Amino acid substitution | dbSNPs ID   | PMT ID <sup>c</sup> | Population | Genotype |     |     | Frequency (%) | <i>P</i> |
|-------------------|-------------------------------|---------------------------|-------------------------|-------------------------|-------------|---------------------|------------|----------|-----|-----|---------------|----------|
|                   |                               |                           |                         |                         |             |                     |            | R/R      | R/V | V/V |               |          |
| IVS 16            | 19582233                      | c.1481-14                 | G>A                     | -                       | rs147093603 | 5609                | Japanese   | 95       | 1   | 0   | 0.5%          | -        |
|                   |                               |                           |                         |                         |             |                     | Caucasian  | 96       | 0   | 0   | 0.0%          |          |
|                   |                               |                           |                         |                         |             |                     | African    | 96       | 0   | 0   | 0.0%          |          |
| Exon 17<br>3'-UTR | 19581766                      | c.*233                    | C>T                     | -                       | rs112727278 | N.A.                | Japanese   | 93       | 3   | 0   | 1.6%          | -        |
|                   |                               |                           |                         |                         |             |                     | Caucasian  | 96       | 0   | 0   | 0.0%          |          |
|                   |                               |                           |                         |                         |             |                     | African    | 92       | 4   | 0   | 2.1%          |          |

<sup>d</sup>Non-coding region, number refers to the position from the nearest CDS; \* number refers to the position from the stop codon
